# Supplementary material
Source: Springer Nature journal article supplement (https://www.springermedizin.de/resource/supplementary/13075_2010_9754_MOESM3_ESM.pdf/9693356)

ratio test OD/ positive control OD

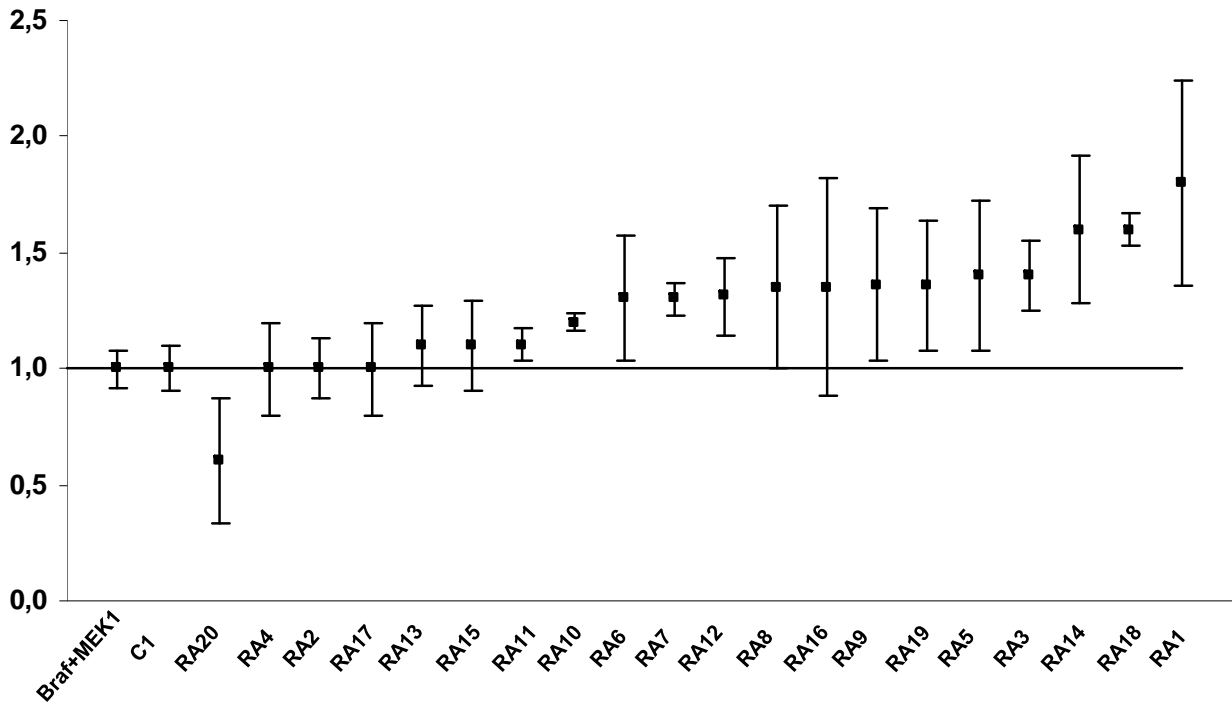

Supplement: MOESM3 [file 9693356]
